# Supplementary material for: Carbon-coated rhombohedral Li3V2(PO4)3 as both cathode and anode materials for lithium-ion batteries: electrochemical performance and lithium storage mechanism
Source: Royal Society of Chemistry journal article supplement (doi:10.1039/c4ta04630g), 2014-01-01
Supplement: c4ta04630g1.pdf [file c4ta04630g1.pdf]

Supporting Information for

## Carbon-Coated Rhombohedral $\text{Li}_3\text{V}_2(\text{PO}_4)_3$ as Both Cathode and Anode Materials for Lithium-Ion Batteries: Electrochemical Performance and Storage Mechanism

Zelang Jian,<sup>a,†</sup> Wenzhe Han,<sup>b,†</sup> Yanliang Liang,<sup>a</sup> Yucheng Lan,<sup>c</sup> Zheng Fang,<sup>d</sup> Yong-Sheng Hu<sup>d</sup> and Yan Yao<sup>a,e\*</sup>

<sup>a</sup> Department of Electrical and Computer Engineering, University of Houston, Houston, Texas 77204, USA.

E-mail: yyao4@uh.edu

<sup>b</sup> China Institute of Atomic Energy, Beijing 102413, China.

<sup>c</sup> Department of Physics, University of Houston, Houston, Texas 77204, USA

<sup>d</sup> Beijing National Laboratory for Condensed Matter Physics, Institute of Physics, Chinese Academy of Science, Beijing 100190, China

<sup>e</sup> Texas Center for Superconductivity at the University of Houston, Houston, Texas 77204, USA

† Z. L. Jian and W. Z. Han contributed equally to this work.

**Table S1** Crystallographic data of the r-LVP/C sample at room temperature.

| Atom | Type | Wyckoff | X/a     | Y/b     | Z/c     | Occ.  |
|------|------|---------|---------|---------|---------|-------|
| Li   | Li1  | 18f     | 0.2     | 0.00641 | 0.45052 | 0.944 |
| Na   | Na1  | 3a      | 0.07496 | 0.02897 | 0.00136 | 0.028 |
| Na   | Na2  | 3b      | 0.07496 | 0.02897 | 0.49864 | 0.028 |
| P    | P1   | 18f     | 0.28981 | 0.00495 | 0.25    | 1     |
| V    | V1   | 6c      | 0       | 0       | 0.14472 | 1     |
| V    | V2   | 6c      | 0       | 0       | 0.65265 | 1     |
| O    | O1   | 18f     | 0.18274 | 0.00637 | 0.19027 | 1     |
| O    | O2   | 18f     | 0.75113 | 0.00638 | 0.69918 | 1     |
| O    | O3   | 18f     | 0.23546 | 0.00639 | 0.26532 | 1     |
| O    | O4   | 18f     | 0.49751 | -0.0064 | 0.75353 | 1     |

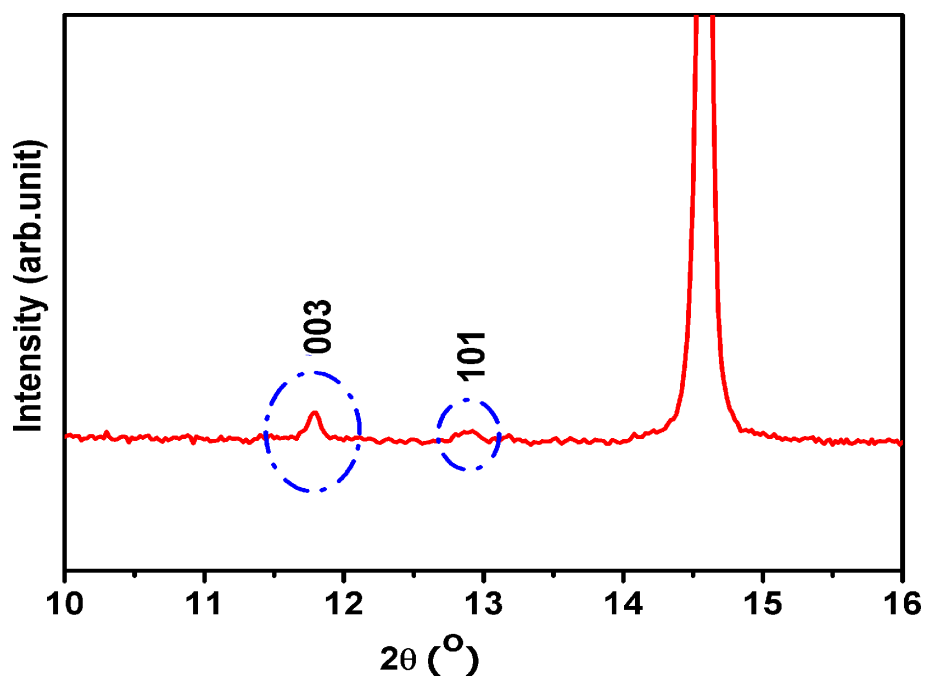

Figure S1 Magnified XRD particular patterns of r-LVP/C

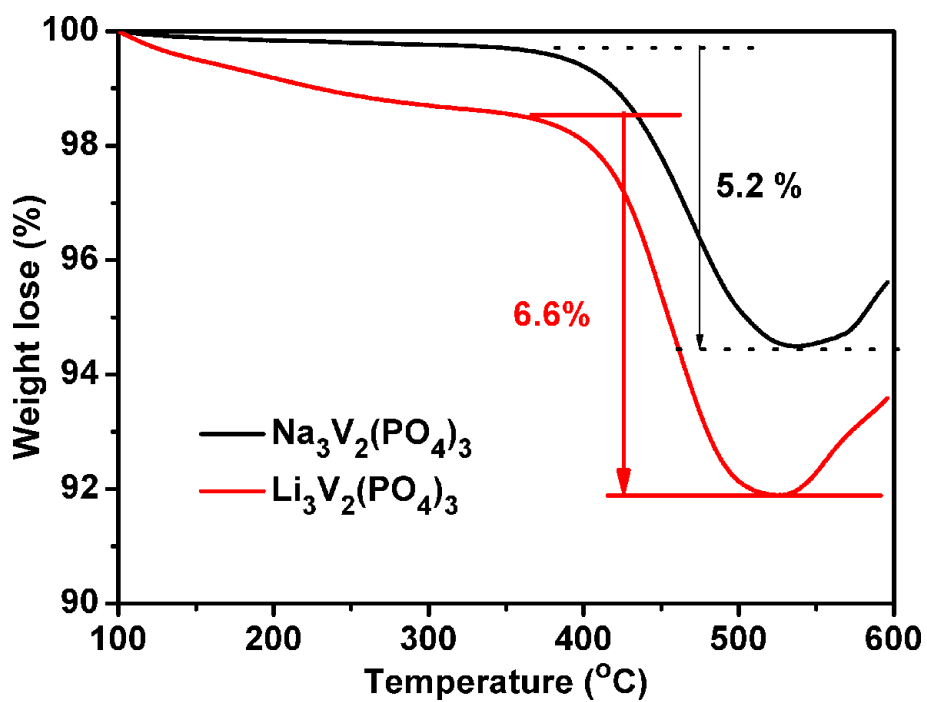

Figure S2 TGA curves of r-NVP/C and r-LVP/C in air atmosphere.

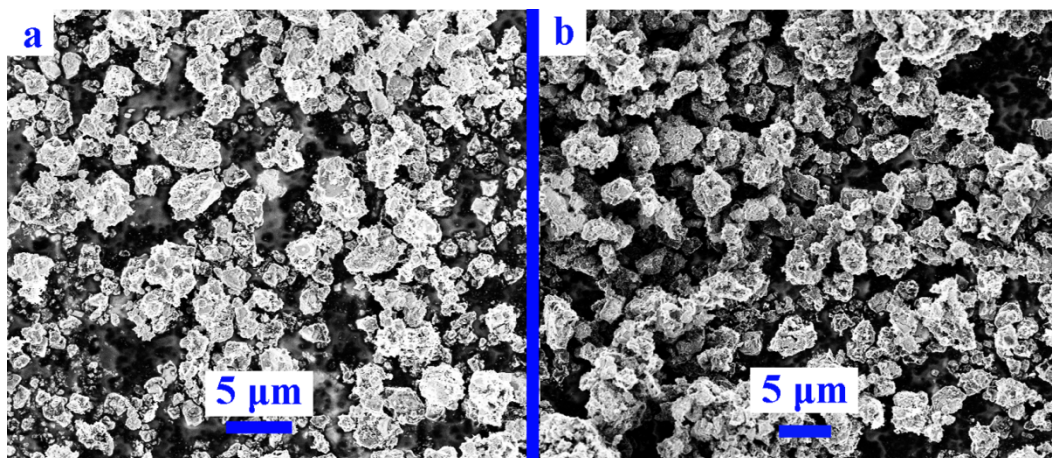

**Figure S3** SEM images of (a) r-NVP/C and (b) r-LVP/C

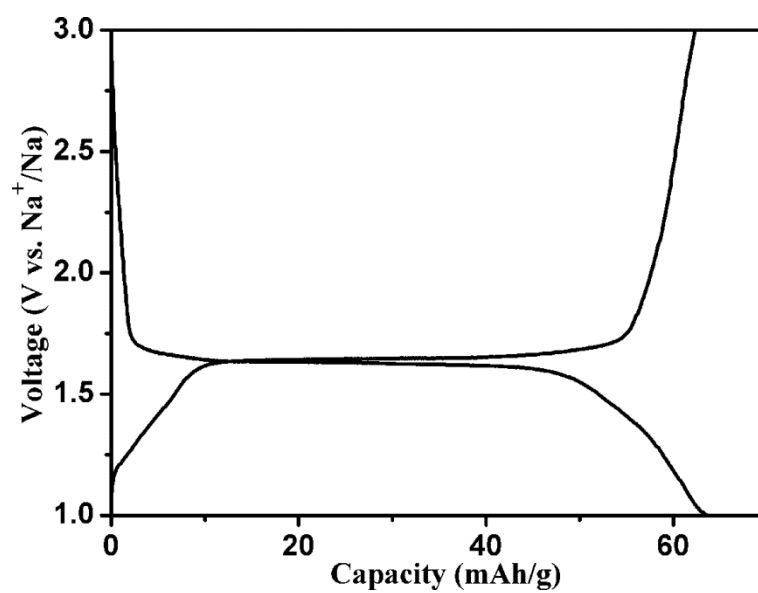

**Figure S4** Discharge/charge curves of the carbon coated r-NVP vs Na anode.
